# Supplementary material
Source: PubMed Central journal article supplement (PMC2693447)
Supplement: NIHMS90020-supplement-6_si_006.pdf [file NIHMS90020-supplement-6_si_006.pdf]

## KEGG Pathways Analysis Result

| Pathway                  | # of protein ids | # of total protein | p-value (right tail)  | protein id list                                                                                                                                                                                                                                                                                                                                                                                                                                                                                                                                                                                                                                                                                                                                                                                                                                                                                                                                                                                                                                                                                                                                                                                                                                                                                                                                      |
|--------------------------|------------------|--------------------|-----------------------|------------------------------------------------------------------------------------------------------------------------------------------------------------------------------------------------------------------------------------------------------------------------------------------------------------------------------------------------------------------------------------------------------------------------------------------------------------------------------------------------------------------------------------------------------------------------------------------------------------------------------------------------------------------------------------------------------------------------------------------------------------------------------------------------------------------------------------------------------------------------------------------------------------------------------------------------------------------------------------------------------------------------------------------------------------------------------------------------------------------------------------------------------------------------------------------------------------------------------------------------------------------------------------------------------------------------------------------------------|
| <a href="#">hsa01430</a> | 30               | 137                | 9.09748321811112E-14  | IPI00290078[ <a href="#">KRT4</a> , ],<br>IPI00450768[ <a href="#">KRT17</a> , ],<br>IPI00241841[ <a href="#">KRT6L</a> , ],<br>IPI00298971[ <a href="#">VTN</a> , ],<br>IPI00015309[ <a href="#">KRT12</a> , ],<br>IPI00479145[ <a href="#">KRT19</a> , ],<br>IPI00166205[ <a href="#">K5B</a> , ],<br>IPI00554788[ <a href="#">KRT18</a> , ],<br>IPI00296922[ <a href="#">LAMB2</a> , ],<br>IPI00009867[ <a href="#">KRT5</a> , ],<br>IPI00293665[ <a href="#">KRT6B</a> , ],<br>IPI00220327[ <a href="#">KRT1</a> , ],<br>IPI00021304[ <a href="#">KRT2A</a> , ],<br>IPI00296099[ <a href="#">THBS1</a> , ],<br>IPI00298281[ <a href="#">LAMC1</a> , ],<br>IPI00028931[ <a href="#">DSG2</a> , ],<br>IPI00021439[ <a href="#">ACTB</a> , ],<br>IPI00300725[ <a href="#">KRT6C</a> , <a href="#">KRT6A</a> , ],<br>IPI00383111[ <a href="#">KRT10</a> , ],<br>IPI00290077[ <a href="#">KRT15</a> , ],<br>IPI00217963[ <a href="#">KRT16</a> , ],<br>IPI00174775[ <a href="#">K6IRS3</a> , ],<br>IPI00027422[ <a href="#">ITGB4</a> , ],<br>IPI00025846[ <a href="#">DSC2</a> , ],<br>IPI00329482[ <a href="#">LAMA4</a> , ],<br>IPI00009865[ <a href="#">KRT10</a> , ],<br>IPI00554648[ <a href="#">KRT8</a> , ],<br>IPI00291136[ <a href="#">COL6A1</a> , ],<br>IPI00384444[ <a href="#">KRT14</a> , ],<br>IPI00019359[ <a href="#">KRT9</a> , ], |
| <a href="#">hsa00510</a> | 11               | 41                 | 8.39828724134271E-7   | IPI00016743[ <a href="#">MGAT4A</a> , ],<br>IPI00009145[ <a href="#">MAN1A2</a> , ],<br>IPI00383581[ <a href="#">GANAB</a> , ],<br>IPI00302523[ <a href="#">FUT8</a> , ],<br>IPI00003802[ <a href="#">MAN2A1</a> , ],<br>IPI00654619[ <a href="#">B4GALT3</a> , ],<br>IPI00215767[ <a href="#">B4GALT1</a> , ],<br>IPI00328170[ <a href="#">GCS1</a> , ],<br>IPI00291641[ <a href="#">MAN1A1</a> , ],<br>IPI00000138[ <a href="#">MGAT1</a> , ],<br>IPI00179044[ <a href="#">MGAT1</a> , ],                                                                                                                                                                                                                                                                                                                                                                                                                                                                                                                                                                                                                                                                                                                                                                                                                                                          |
| <a href="#">hsa01030</a> | 18               | 115                | 1.8982352752825001E-6 | IPI00302523[ <a href="#">FUT8</a> , ],<br>IPI00000138[ <a href="#">MGAT1</a> , ],<br>IPI00291641[ <a href="#">MAN1A1</a> , ],<br>IPI00004047[ <a href="#">EXT2</a> , ],<br>IPI00339297[ <a href="#">GALNT4</a> , ],<br>IPI00006248[ <a href="#">GCNT3</a> , ],<br>IPI00016743[ <a href="#">MGAT4A</a> , ],<br>IPI00009629[ <a href="#">ST3GAL1</a> , ],<br>IPI00009145[ <a href="#">MAN1A2</a> , ],<br>IPI00383581[ <a href="#">GANAB</a> , ],<br>IPI00003802[ <a href="#">MAN2A1</a> , ],                                                                                                                                                                                                                                                                                                                                                                                                                                                                                                                                                                                                                                                                                                                                                                                                                                                           |

|                          |    |    |                              |                                                                                                                                                                                                                                                                                                                                                                                                                                                                                                                                                                                                                                                   |
|--------------------------|----|----|------------------------------|---------------------------------------------------------------------------------------------------------------------------------------------------------------------------------------------------------------------------------------------------------------------------------------------------------------------------------------------------------------------------------------------------------------------------------------------------------------------------------------------------------------------------------------------------------------------------------------------------------------------------------------------------|
|                          |    |    |                              | <a href="#">IPI00654619</a> <a href="#">B4GALT3</a> ,<br><a href="#">IPI00328170</a> <a href="#">GCS1</a> ,<br><a href="#">IPI00215767</a> <a href="#">B4GALT1</a> ,<br><a href="#">IPI00044326</a> <a href="#">D4ST1</a> ,<br><a href="#">IPI00005599</a> <a href="#">NDST1</a> ,<br><a href="#">IPI00179044</a> <a href="#">MGAT1</a> ,<br><a href="#">IPI00101299</a> <a href="#">C1GALT1C1</a> ,                                                                                                                                                                                                                                              |
| <a href="#">hsa05110</a> | 9  | 41 | <b>4.9181069975125895E-5</b> | <a href="#">IPI00009852</a> <a href="#">ATP6V0A4</a> ,<br><a href="#">IPI00095891</a> <a href="#">GNAS</a> ,<br><a href="#">IPI00004488</a> <a href="#">ATP6V1F</a> ,<br><a href="#">IPI00296191</a> <a href="#">ATP6V1H</a> ,<br><a href="#">IPI00007682</a> <a href="#">ATP6V1A</a> ,<br><a href="#">IPI00003856</a> <a href="#">ATP6V1E1</a> ,<br><a href="#">IPI00215914</a> <a href="#">ARF1</a> ,<br><a href="#">IPI00034159</a> <a href="#">ATP6V0D1</a> ,<br><a href="#">IPI00001568</a> <a href="#">ATP6V1D</a> ,                                                                                                                        |
| <a href="#">hsa05131</a> | 10 | 53 | <b>7.480807263403253E-5</b>  | <a href="#">IPI00180675</a> <a href="#">TUBA3</a> ,<br><a href="#">IPI00027500</a> <a href="#">RHOA</a> ,<br><a href="#">IPI00018146</a> <a href="#">YWHAQ</a> ,<br><a href="#">IPI00029260</a> <a href="#">CD14</a> ,<br><a href="#">IPI00021439</a> <a href="#">ACTB</a> ,<br><a href="#">IPI00011654</a> <a href="#">TUBB</a> ,<br><a href="#">IPI00554788</a> <a href="#">KRT18</a> ,<br><a href="#">IPI00007750</a> <a href="#">TUBA1</a> ,<br><a href="#">IPI00479359</a> <a href="#">VIL2</a> ,<br><a href="#">IPI00021263</a> <a href="#">YWHAZ</a> ,                                                                                     |
| <a href="#">hsa05130</a> | 10 | 53 | <b>7.480807263403253E-5</b>  | <a href="#">IPI00180675</a> <a href="#">TUBA3</a> ,<br><a href="#">IPI00027500</a> <a href="#">RHOA</a> ,<br><a href="#">IPI00018146</a> <a href="#">YWHAQ</a> ,<br><a href="#">IPI00029260</a> <a href="#">CD14</a> ,<br><a href="#">IPI00021439</a> <a href="#">ACTB</a> ,<br><a href="#">IPI00011654</a> <a href="#">TUBB</a> ,<br><a href="#">IPI00554788</a> <a href="#">KRT18</a> ,<br><a href="#">IPI00007750</a> <a href="#">TUBA1</a> ,<br><a href="#">IPI00479359</a> <a href="#">VIL2</a> ,<br><a href="#">IPI00021263</a> <a href="#">YWHAZ</a> ,                                                                                     |
| <a href="#">hsa05120</a> | 11 | 68 | <b>1.4223630906207244E-4</b> | <a href="#">IPI00009852</a> <a href="#">ATP6V0A4</a> ,<br><a href="#">IPI00001754</a> <a href="#">F11R</a> ,<br><a href="#">IPI00004488</a> <a href="#">ATP6V1F</a> ,<br><a href="#">IPI00296191</a> <a href="#">ATP6V1H</a> ,<br><a href="#">IPI00007812</a> <a href="#">ATP6V1B2</a> ,<br><a href="#">IPI00007682</a> <a href="#">ATP6V1A</a> ,<br><a href="#">IPI00020430</a> <a href="#">ATP6API</a> ,<br><a href="#">IPI00304911</a> <a href="#">ATP6V1B1</a> ,<br><a href="#">IPI00003856</a> <a href="#">ATP6V1E1</a> ,<br><a href="#">IPI00034159</a> <a href="#">ATP6V0D1</a> ,<br><a href="#">IPI00001568</a> <a href="#">ATP6V1D</a> , |
| <a href="#">hsa04512</a> | 12 | 87 | <b>3.3856427247224796E-4</b> | <a href="#">IPI00298281</a> <a href="#">LAMC1</a> ,<br><a href="#">IPI00296922</a> <a href="#">LAMB2</a> ,<br><a href="#">IPI00011564</a> <a href="#">SDC4</a> ,<br><a href="#">IPI00297160</a> <a href="#">CD44</a> ,<br><a href="#">IPI00024284</a> <a href="#">HSPG2</a> ,<br><a href="#">IPI00298971</a> <a href="#">VTN</a> ,<br><a href="#">IPI00329482</a> <a href="#">LAMA4</a> ,<br><a href="#">IPI00374563</a> <a href="#">AGRN</a> ,                                                                                                                                                                                                   |

|                          |    |     |                       |                                                                                                                                                                                                                                                                                                                                                                                                                                                                                                                               |
|--------------------------|----|-----|-----------------------|-------------------------------------------------------------------------------------------------------------------------------------------------------------------------------------------------------------------------------------------------------------------------------------------------------------------------------------------------------------------------------------------------------------------------------------------------------------------------------------------------------------------------------|
|                          |    |     |                       | IPI00291136[ <a href="#">COL6A1</a> , ],<br>IPI00296099[ <a href="#">THBS1</a> , ],<br>IPI00027422[ <a href="#">ITGB4</a> , ],<br>IPI00028911[ <a href="#">DAGL</a> , ],                                                                                                                                                                                                                                                                                                                                                      |
| <a href="#">hsa00010</a> | 9  | 64  | 0.001605718178926483  | IPI00465248[ <a href="#">ENO1</a> , ],<br>IPI00169383[ <a href="#">PGK1</a> , ],<br>IPI00027497[ <a href="#">GPI</a> , ],<br>IPI00332371[ <a href="#">PFKL</a> , ],<br>IPI00219018[ <a href="#">GAPDH</a> , ],<br>IPI00220271[ <a href="#">AKR1A1</a> , ],<br>IPI00465439[ <a href="#">ALDOA</a> , ],<br>IPI00479186[ <a href="#">PKM2</a> , ],<br>IPI00465028[ <a href="#">TPI1</a> , ],                                                                                                                                     |
| <a href="#">hsa00602</a> | 5  | 21  | 0.0016848573706943963 | IPI00021384[ <a href="#">FUT6</a> , ],<br>IPI00654619[ <a href="#">B4GALT3</a> , ],<br>IPI00215767[ <a href="#">B4GALT1</a> , ],<br>IPI00007671[ <a href="#">FUT3</a> , ],<br>IPI00184851[ <a href="#">ST3GAL6</a> , ],                                                                                                                                                                                                                                                                                                       |
| <a href="#">hsa00710</a> | 5  | 22  | 0.0021040723075692247 | IPI00169383[ <a href="#">PGK1</a> , ],<br>IPI00465439[ <a href="#">ALDOA</a> , ],<br>IPI00219029[ <a href="#">GOT1</a> , ],<br>IPI00479186[ <a href="#">PKM2</a> , ],<br>IPI00465028[ <a href="#">TPI1</a> , ],                                                                                                                                                                                                                                                                                                               |
| <a href="#">hsa00533</a> | 4  | 16  | 0.004132958064598382  | IPI00009629[ <a href="#">ST3GAL1</a> , ],<br>IPI00302523[ <a href="#">FUT8</a> , ],<br>IPI00654619[ <a href="#">B4GALT3</a> , ],<br>IPI00215767[ <a href="#">B4GALT1</a> , ],                                                                                                                                                                                                                                                                                                                                                 |
| <a href="#">hsa04612</a> | 9  | 83  | 0.009342153709883248  | IPI00295741[ <a href="#">CTSB</a> , ],<br>IPI00026569[ <a href="#">HLA-A</a> , ],<br>IPI00005171[ <a href="#">HLA-DRA</a> , ],<br>IPI00025252[ <a href="#">PDIA3</a> , ],<br>IPI00334775[ <a href="#">HSPCB</a> , ],<br>IPI00382470[ <a href="#">HSPCA</a> , ],<br>IPI00020599[ <a href="#">CALR</a> , ],<br>IPI00003362[ <a href="#">HSPA5</a> , ],<br>IPI00004656[ <a href="#">B2M</a> , ],                                                                                                                                 |
| <a href="#">hsa01031</a> | 7  | 62  | 0.016958778205323842  | IPI00009629[ <a href="#">ST3GAL1</a> , ],<br>IPI00021384[ <a href="#">FUT6</a> , ],<br>IPI00024466[ <a href="#">UGCGL1</a> , ],<br>IPI00654619[ <a href="#">B4GALT3</a> , ],<br>IPI00215767[ <a href="#">B4GALT1</a> , ],<br>IPI00007671[ <a href="#">FUT3</a> , ],<br>IPI00184851[ <a href="#">ST3GAL6</a> , ],                                                                                                                                                                                                              |
| <a href="#">hsa04510</a> | 15 | 194 | 0.020871384891946048  | IPI00015148[ <a href="#">RAP1B</a> , ],<br>IPI00298281[ <a href="#">LAMC1</a> , ],<br>IPI00021439[ <a href="#">ACTB</a> , ],<br>IPI00298971[ <a href="#">VTN</a> , ],<br>IPI00099977[ <a href="#">PDGFC</a> , ],<br>IPI00013508[ <a href="#">ACTN1</a> , ],<br>IPI00027422[ <a href="#">ITGB4</a> , ],<br>IPI00027500[ <a href="#">RHOA</a> , ],<br>IPI00218236[ <a href="#">PPP1CB</a> , ],<br>IPI00296922[ <a href="#">LAMB2</a> , ],<br>IPI00329482[ <a href="#">LAMA4</a> , ],<br>IPI00013808[ <a href="#">ACTN4</a> , ], |

|                          |    |     |                      |                                                                                                                                                                                                                                                                                                                                                                                                                                                                                                                                                                                                                                                          |
|--------------------------|----|-----|----------------------|----------------------------------------------------------------------------------------------------------------------------------------------------------------------------------------------------------------------------------------------------------------------------------------------------------------------------------------------------------------------------------------------------------------------------------------------------------------------------------------------------------------------------------------------------------------------------------------------------------------------------------------------------------|
|                          |    |     |                      | IPI00291136[ <a href="#">COL6A1</a> , ],<br>IPI00296099[ <a href="#">THBS1</a> , ],<br>IPI00289758[ <a href="#">CAPN2</a> , ],                                                                                                                                                                                                                                                                                                                                                                                                                                                                                                                           |
| <a href="#">hsa00030</a> | 4  | 25  | 0.02115206469760432  | IPI00027497[ <a href="#">GPI</a> , ],<br>IPI00332371[ <a href="#">PFKL</a> , ],<br>IPI00465439[ <a href="#">ALDOA</a> , ],<br>IPI00030828[ <a href="#">H6PD</a> , ],                                                                                                                                                                                                                                                                                                                                                                                                                                                                                     |
| <a href="#">hsa00190</a> | 11 | 127 | 0.02137697329048896  | IPI00009852[ <a href="#">ATP6V0A4</a> , ],<br>IPI00004488[ <a href="#">ATP6V1F</a> , ],<br>IPI00296191[ <a href="#">ATP6V1H</a> , ],<br>IPI00007812[ <a href="#">ATP6V1B2</a> , ],<br>IPI00007682[ <a href="#">ATP6V1A</a> , ],<br>IPI00020430[ <a href="#">ATP6API</a> , ],<br>IPI00304911[ <a href="#">ATP6V1B1</a> , ],<br>IPI00303476[ <a href="#">ATP5B</a> , ],<br>IPI00003856[ <a href="#">ATP6V1E1</a> , ],<br>IPI00034159[ <a href="#">ATP6V0D1</a> , ],<br>IPI00001568[ <a href="#">ATP6V1D</a> , ],                                                                                                                                           |
| <a href="#">hsa04540</a> | 9  | 98  | 0.025502619121931504 | IPI00095891[ <a href="#">GNAS</a> , ],<br>IPI00180675[ <a href="#">TUBA3</a> , ],<br>IPI00305551[ <a href="#">GNAI1</a> , ],<br>IPI00011654[ <a href="#">TUBB</a> , ],<br>IPI00099977[ <a href="#">PDGFC</a> , ],<br>IPI00007750[ <a href="#">TUBA1</a> , ],<br>IPI00219563[ <a href="#">PLCB1</a> , ],<br>IPI00288947[ <a href="#">GNAQ</a> , ],<br>IPI00217906[ <a href="#">GNAI2</a> , ],                                                                                                                                                                                                                                                             |
| <a href="#">hsa00051</a> | 5  | 41  | 0.030671322989580804 | IPI00030207[ <a href="#">GMDS</a> , ],<br>IPI00024466[ <a href="#">UGCG1</a> , ],<br>IPI00332371[ <a href="#">PFKL</a> , ],<br>IPI00465439[ <a href="#">ALDOA</a> , ],<br>IPI00465028[ <a href="#">TPI1</a> , ],                                                                                                                                                                                                                                                                                                                                                                                                                                         |
| <a href="#">hsa04810</a> | 15 | 208 | 0.03590125054708866  | IPI00017367[ <a href="#">RDX</a> , ],<br>IPI00009342[ <a href="#">IQGAP1</a> , ],<br>IPI00021439[ <a href="#">ACTB</a> , ],<br>IPI00026314[ <a href="#">GSN</a> , ],<br>IPI00020060[ <a href="#">SLC9A1</a> , ],<br>IPI00013508[ <a href="#">ACTN1</a> , ],<br>IPI00219365[ <a href="#">MSN</a> , ],<br>IPI00027422[ <a href="#">ITGB4</a> , ],<br>IPI00027500[ <a href="#">RHOA</a> , ],<br>IPI00019502[ <a href="#">MYH9</a> , ],<br>IPI00218236[ <a href="#">PPP1CB</a> , ],<br>IPI00029260[ <a href="#">CD14</a> , ],<br>IPI00013808[ <a href="#">ACTN4</a> , ],<br>IPI00012011[ <a href="#">CFL1</a> , ],<br>IPI00479359[ <a href="#">VIL2</a> , ], |
| <a href="#">hsa04520</a> | 7  | 75  | 0.04268091349542283  | IPI00027500[ <a href="#">RHOA</a> , ],<br>IPI00009342[ <a href="#">IQGAP1</a> , ],<br>IPI00021439[ <a href="#">ACTB</a> , ],<br>IPI00013981[ <a href="#">YES1</a> , ],<br>IPI00013808[ <a href="#">ACTN4</a> , ],<br>IPI00013508[ <a href="#">ACTN1</a> , ],<br>IPI00107831[ <a href="#">PTPRF</a> , ],                                                                                                                                                                                                                                                                                                                                                  |
| <a href="#">hsa00512</a> | 4  | 31  | 0.043012598912158355 | IPI00009629[ <a href="#">ST3GAL1</a> , ],                                                                                                                                                                                                                                                                                                                                                                                                                                                                                                                                                                                                                |

|                          |   |     |                     |                                                                                                                                                                                                                                                                                                                                                                                  |
|--------------------------|---|-----|---------------------|----------------------------------------------------------------------------------------------------------------------------------------------------------------------------------------------------------------------------------------------------------------------------------------------------------------------------------------------------------------------------------|
|                          |   |     |                     | IPI00339297[ <a href="#">GALNT4</a> ,],<br>IPI00101299[ <a href="#">CIGALT1C1</a> ,],<br>IPI00006248[ <a href="#">GCNT3</a> ,],                                                                                                                                                                                                                                                  |
| <a href="#">hsa04670</a> | 9 | 108 | 0.04371611118821832 | IPI00015148[ <a href="#">RAP1B</a> ,],<br>IPI00027500[ <a href="#">RHOA</a> ,],<br>IPI00021439[ <a href="#">ACTB</a> ,],<br>IPI00001754[ <a href="#">F11R</a> ,],<br>IPI00013808[ <a href="#">ACTN4</a> ,],<br>IPI00013508[ <a href="#">ACTN1</a> ,],<br>IPI00219365[ <a href="#">MSN</a> ,],<br>IPI00479359[ <a href="#">VIL2</a> ,],<br>IPI00217906[ <a href="#">GNAI2</a> ,], |
| <a href="#">hsa01510</a> | 4 | 38  | 0.07999022519197399 | IPI00298547[ <a href="#">PARK7</a> ,],<br>IPI00219018[ <a href="#">GAPDH</a> ,],<br>IPI00006608[ <a href="#">APP</a> ,],<br>IPI00003362[ <a href="#">HSPA5</a> ,],                                                                                                                                                                                                               |
| <a href="#">hsa00031</a> | 1 | 2   | 0.08455942482590399 | IPI00465028[ <a href="#">TPI1</a> ,],                                                                                                                                                                                                                                                                                                                                            |
| <a href="#">hsa00480</a> | 4 | 39  | 0.08624459819167568 | IPI00219673[ <a href="#">GSTK1</a> ,],<br>IPI00026199[ <a href="#">GPX3</a> ,],<br>IPI00221224[ <a href="#">ANPEP</a> ,],<br>IPI00219757[ <a href="#">GSTP1</a> ,],                                                                                                                                                                                                              |
| <a href="#">hsa05060</a> | 2 | 13  | 0.10614248745236426 | IPI00298281[ <a href="#">LAMC1</a> ,],<br>IPI00003362[ <a href="#">HSPA5</a> ,],                                                                                                                                                                                                                                                                                                 |
| <a href="#">hsa00401</a> | 1 | 3   | 0.1241249152139577  | IPI00219029[ <a href="#">GOT1</a> ,],                                                                                                                                                                                                                                                                                                                                            |
| <a href="#">hsa04530</a> | 8 | 117 | 0.1333291247128821  | IPI00019502[ <a href="#">MYH9</a> ,],<br>IPI00027500[ <a href="#">RHOA</a> ,],<br>IPI00021439[ <a href="#">ACTB</a> ,],<br>IPI00001754[ <a href="#">F11R</a> ,],<br>IPI00013981[ <a href="#">YES1</a> ,],<br>IPI00013808[ <a href="#">ACTN4</a> ,],<br>IPI00013508[ <a href="#">ACTN1</a> ,],<br>IPI00217906[ <a href="#">GNAI2</a> ,],                                          |
| <a href="#">hsa05040</a> | 3 | 31  | 0.14830309213003623 | IPI00075248[ <a href="#">CALM2,CALM1,CALM3</a> ,],<br>IPI00219018[ <a href="#">GAPDH</a> ,],<br>IPI00024067[ <a href="#">CLTC</a> ,],                                                                                                                                                                                                                                            |
| <a href="#">hsa00830</a> | 1 | 4   | 0.16198432154252929 | IPI00218914[ <a href="#">ALDH1A1</a> ,],                                                                                                                                                                                                                                                                                                                                         |
| <a href="#">hsa05020</a> | 2 | 17  | 0.16564814813553422 | IPI00645078[ <a href="#">UBE1</a> ,],<br>IPI00298547[ <a href="#">PARK7</a> ,],                                                                                                                                                                                                                                                                                                  |
| <a href="#">hsa04720</a> | 5 | 69  | 0.1771801948349379  | IPI00015148[ <a href="#">RAP1B</a> ,],<br>IPI00218236[ <a href="#">PPP1CB</a> ,],<br>IPI00075248[ <a href="#">CALM2,CALM1,CALM3</a> ,],<br>IPI00219563[ <a href="#">PLCB1</a> ,],<br>IPI00288947[ <a href="#">GNAQ</a> ,],                                                                                                                                                       |
| <a href="#">hsa04610</a> | 5 | 69  | 0.1771801948349379  | IPI00011302[ <a href="#">CD59</a> ,],<br>IPI00019580[ <a href="#">PLG</a> ,],<br>IPI00164623[ <a href="#">C3</a> ,],<br>IPI00418163[ <a href="#">XXbac-BPG116M5.7,C4B</a> ,],<br>IPI00019591[ <a href="#">BF</a> ,],                                                                                                                                                             |
| <a href="#">hsa04640</a> | 6 | 88  | 0.18000060372460336 | IPI00011302[ <a href="#">CD59</a> ,],<br>IPI00029260[ <a href="#">CD14</a> ,],                                                                                                                                                                                                                                                                                                   |

|                          |   |     |                     |                                                                                                                                                                                                                                                          |
|--------------------------|---|-----|---------------------|----------------------------------------------------------------------------------------------------------------------------------------------------------------------------------------------------------------------------------------------------------|
|                          |   |     |                     | IPI00297160[ <a href="#">CD44</a> ,],<br>IPI00005171[ <a href="#">HLA-DRA</a> ,],<br>IPI00221224[ <a href="#">ANPEP</a> ,],<br>IPI00215997[ <a href="#">CD9</a> ,],                                                                                      |
| <a href="#">hsa00534</a> | 2 | 19  | 0.19718272313119237 | IPI00004047[ <a href="#">EXT2</a> ,],<br>IPI00005599[ <a href="#">NDST1</a> ,],                                                                                                                                                                          |
| <a href="#">hsa00950</a> | 1 | 5   | 0.19821104097634715 | IPI00219029[ <a href="#">GOT1</a> ,],                                                                                                                                                                                                                    |
| <a href="#">hsa04730</a> | 5 | 76  | 0.2310127943312469  | IPI00095891[ <a href="#">GNAS</a> ,],<br>IPI00305551[ <a href="#">GNAI1</a> ,],<br>IPI00219563[ <a href="#">PLCB1</a> ,],<br>IPI00288947[ <a href="#">GNAQ</a> ,],<br>IPI00217906[ <a href="#">GNAI2</a> ,],                                             |
| <a href="#">hsa00520</a> | 1 | 6   | 0.23287532037999356 | IPI00410544[ <a href="#">UXS1</a> ,],                                                                                                                                                                                                                    |
| <a href="#">hsa00532</a> | 2 | 22  | 0.24558426600403185 | IPI00044326[ <a href="#">D4ST1</a> ,],<br>IPI00304331[ <a href="#">B3GAT3</a> ,],                                                                                                                                                                        |
| <a href="#">hsa00530</a> | 2 | 25  | 0.29436380955332936 | IPI00009305[ <a href="#">GNPDA1</a> ,],<br>IPI00470674[ <a href="#">CYB5R1</a> ,],                                                                                                                                                                       |
| <a href="#">hsa03060</a> | 1 | 8   | 0.2977825987653134  | IPI00385267[ <a href="#">SRPR</a> ,],                                                                                                                                                                                                                    |
| <a href="#">hsa00500</a> | 5 | 85  | 0.3057976355020298  | IPI00006725[ <a href="#">DDX23</a> ,],<br>IPI00300786[ <a href="#">AMY1A,AMY1C,AMY1B</a> ,],<br>IPI00027497[ <a href="#">GPI</a> ,],<br>IPI00020999[ <a href="#">ENPP3</a> ,],<br>IPI00410544[ <a href="#">UXS1</a> ,],                                  |
| <a href="#">hsa00400</a> | 1 | 9   | 0.3281515255582169  | IPI00219029[ <a href="#">GOT1</a> ,],                                                                                                                                                                                                                    |
| <a href="#">hsa00310</a> | 3 | 47  | 0.331828011559372   | IPI00030255[ <a href="#">PLOD3</a> ,],<br>IPI00027192[ <a href="#">PLOD1</a> ,],<br>IPI00337495[ <a href="#">PLOD2</a> ,],                                                                                                                               |
| <a href="#">hsa05010</a> | 2 | 28  | 0.34268374724227857 | IPI00219018[ <a href="#">GAPDH</a> ,],<br>IPI00006608[ <a href="#">APP</a> ,],                                                                                                                                                                           |
| <a href="#">hsa04110</a> | 6 | 112 | 0.3550555466593255  | IPI00018146[ <a href="#">YWHAQ</a> ,],<br>IPI00216319[ <a href="#">YWHAH</a> ,],<br>IPI00220642[ <a href="#">YWHAG</a> ,],<br>IPI00000816[ <a href="#">YWHAE</a> ,],<br>IPI00216318[ <a href="#">YWHAB</a> ,],<br>IPI00021263[ <a href="#">YWHAZ</a> ,], |
| <a href="#">hsa00601</a> | 1 | 10  | 0.35721010991040986 | IPI00007671[ <a href="#">FUT3</a> ,],                                                                                                                                                                                                                    |
| <a href="#">hsa04740</a> | 2 | 31  | 0.3899077197585691  | IPI00298082[ <a href="#">CLCA4</a> ,],<br>IPI00075248[ <a href="#">CALM2,CALM1,CALM3</a> ,],                                                                                                                                                             |
| <a href="#">hsa00052</a> | 2 | 32  | 0.405319805048286   | IPI00332371[ <a href="#">PFKL</a> ,],<br>IPI00215767[ <a href="#">B4GALT1</a> ,],                                                                                                                                                                        |
| <a href="#">hsa04912</a> | 5 | 97  | 0.4094666801196179  | IPI00095891[ <a href="#">GNAS</a> ,],<br>IPI00305551[ <a href="#">GNAI1</a> ,],<br>IPI00075248[ <a href="#">CALM2,CALM1,CALM3</a> ,],<br>IPI00219563[ <a href="#">PLCB1</a> ,],<br>IPI00288947[ <a href="#">GNAQ</a> ,],                                 |
| <a href="#">hsa04916</a> | 5 | 102 | 0.4523562250039749  | IPI00095891[ <a href="#">GNAS</a> ,],<br>IPI00075248[ <a href="#">CALM2,CALM1,CALM3</a> ,],<br>IPI00219563[ <a href="#">PLCB1</a> ,],                                                                                                                    |

|                          |   |     |                     |                                                                                                                                                                                                                           |
|--------------------------|---|-----|---------------------|---------------------------------------------------------------------------------------------------------------------------------------------------------------------------------------------------------------------------|
|                          |   |     |                     | IPI00288947[ <a href="#">GNAQ</a> ,],<br>IPI00217906[ <a href="#">GNAI2</a> ,],                                                                                                                                           |
| <a href="#">hsa00603</a> | 1 | 14  | 0.46143344821251353 | IPI00009629[ <a href="#">ST3GAL1</a> ,],                                                                                                                                                                                  |
| <a href="#">hsa00363</a> | 1 | 14  | 0.46143344821251353 | IPI00299778[ <a href="#">PON3</a> ,],                                                                                                                                                                                     |
| <a href="#">hsa00930</a> | 1 | 15  | 0.4847395085842946  | IPI00220271[ <a href="#">AKR1A1</a> ,],                                                                                                                                                                                   |
| <a href="#">hsa05050</a> | 1 | 15  | 0.4847395085842946  | IPI00219018[ <a href="#">GAPDH</a> ,],                                                                                                                                                                                    |
| <a href="#">hsa00511</a> | 1 | 16  | 0.5070393421413315  | IPI00029817[ <a href="#">NEU1</a> ,],                                                                                                                                                                                     |
| <a href="#">hsa00604</a> | 1 | 16  | 0.5070393421413315  | IPI00009629[ <a href="#">ST3GAL1</a> ,],                                                                                                                                                                                  |
| <a href="#">hsa00740</a> | 1 | 16  | 0.5070393421413315  | IPI00020999[ <a href="#">ENPP3</a> ,],                                                                                                                                                                                    |
| <a href="#">hsa00770</a> | 1 | 17  | 0.5283762917747317  | IPI00020999[ <a href="#">ENPP3</a> ,],                                                                                                                                                                                    |
| <a href="#">hsa04614</a> | 1 | 17  | 0.5283762917747317  | IPI00221224[ <a href="#">ANPEP</a> ,],                                                                                                                                                                                    |
| <a href="#">hsa00272</a> | 1 | 17  | 0.5283762917747317  | IPI00219029[ <a href="#">GOT1</a> ,],                                                                                                                                                                                     |
| <a href="#">hsa04940</a> | 2 | 45  | 0.5851704637281755  | IPI00026569[ <a href="#">HLA-A</a> ,],<br>IPI00005171[ <a href="#">HLA-DRA</a> ,],                                                                                                                                        |
| <a href="#">hsa03320</a> | 3 | 70  | 0.58818951504197    | IPI00022733[ <a href="#">PLTP</a> ,],<br>IPI00021841[ <a href="#">APOA1,LOC440837</a> ,],<br>IPI00021854[ <a href="#">APOA2</a> ,],                                                                                       |
| <a href="#">hsa00910</a> | 1 | 23  | 0.6383797154302947  | IPI00295105[ <a href="#">CA6</a> ,],                                                                                                                                                                                      |
| <a href="#">hsa04742</a> | 2 | 53  | 0.6742893703947901  | IPI00095891[ <a href="#">GNAS</a> ,],<br>IPI00026268[ <a href="#">GNB1</a> ,],                                                                                                                                            |
| <a href="#">hsa00361</a> | 1 | 26  | 0.6833688313548582  | IPI00299778[ <a href="#">PON3</a> ,],                                                                                                                                                                                     |
| <a href="#">hsa00590</a> | 2 | 54  | 0.684264082577851   | IPI00026199[ <a href="#">GPX3</a> ,],<br>IPI00295386[ <a href="#">CBR1</a> ,],                                                                                                                                            |
| <a href="#">hsa04514</a> | 5 | 133 | 0.6870245418818282  | IPI00011564[ <a href="#">SDC4</a> ,],<br>IPI00026569[ <a href="#">HLA-A</a> ,],<br>IPI00001754[ <a href="#">F11R</a> ,],<br>IPI00005171[ <a href="#">HLA-DRA</a> ,],<br>IPI00107831[ <a href="#">PTPRE</a> ,],            |
| <a href="#">hsa04910</a> | 5 | 135 | 0.6995848367233334  | IPI00218236[ <a href="#">PPP1CB</a> ,],<br>IPI00075248[ <a href="#">CALM2,CALM1,CALM3</a> ,],<br>IPI00332371[ <a href="#">PFKL</a> ,],<br>IPI00479186[ <a href="#">PKM2</a> ,],<br>IPI00107831[ <a href="#">PTPRE</a> ,], |
| <a href="#">hsa04210</a> | 3 | 84  | 0.7100015475898591  | IPI00011285[ <a href="#">CAPN1</a> ,],<br>IPI00000049[ <a href="#">TNFSF10</a> ,],<br>IPI00289758[ <a href="#">CAPN2</a> ,],                                                                                              |
| <a href="#">hsa00561</a> | 2 | 57  | 0.7126927461195907  | IPI00024466[ <a href="#">UGCG1</a> ,],<br>IPI00220271[ <a href="#">AKR1A1</a> ,],                                                                                                                                         |
| <a href="#">hsa00360</a> | 1 | 29  | 0.7227726564654355  | IPI00219029[ <a href="#">GOT1</a> ,],                                                                                                                                                                                     |
| <a href="#">hsa05222</a> | 3 | 87  | 0.7321652694120983  | IPI00298281[ <a href="#">LAMC1</a> ,],<br>IPI00296922[ <a href="#">LAMB2</a> ,],<br>IPI00329482[ <a href="#">LAMA4</a> ,],                                                                                                |
| <a href="#">hsa01032</a> | 1 | 30  | 0.7347882541217623  | IPI00029817[ <a href="#">NEU1</a> ,],                                                                                                                                                                                     |
| <a href="#">hsa00251</a> | 1 | 30  | 0.7347882541217623  | IPI00219029[ <a href="#">GOT1</a> ,],                                                                                                                                                                                     |
| <a href="#">hsa00252</a> | 1 | 32  | 0.7572831256906449  | IPI00219029[ <a href="#">GOT1</a> ,],                                                                                                                                                                                     |
| <a href="#">hsa00330</a> | 1 | 35  | 0.7875066352242581  | IPI00219029[ <a href="#">GOT1</a> ,],                                                                                                                                                                                     |
| <a href="#">hsa04115</a> | 2 | 68  | 0.7991241969121297  | IPI00020446[ <a href="#">CD82</a> ,],                                                                                                                                                                                     |

|                          |   |     |                    |                                                                                                                                                                                                                                                                                                                                              |
|--------------------------|---|-----|--------------------|----------------------------------------------------------------------------------------------------------------------------------------------------------------------------------------------------------------------------------------------------------------------------------------------------------------------------------------------|
| <a href="#">hsa04360</a> | 4 | 128 | 0.8098799547673728 | <a href="#">IPI00296099</a> [ <a href="#">THBS1</a> ,<br><a href="#">IPI00027500</a> [ <a href="#">RHOA</a> ,]<br><a href="#">IPI00024570</a> [ <a href="#">SEMA3G</a> ,]<br><a href="#">IPI00012011</a> [ <a href="#">CFL1</a> ,]<br><a href="#">IPI00217906</a> [ <a href="#">GNAI2</a> ,]                                                 |
| <a href="#">hsa00980</a> | 2 | 70  | 0.8121125400530467 | <a href="#">IPI00219673</a> [ <a href="#">GSTK1</a> ,]<br><a href="#">IPI00219757</a> [ <a href="#">GSTP1</a> ,]                                                                                                                                                                                                                             |
| <a href="#">hsa00600</a> | 1 | 38  | 0.8139745943466297 | <a href="#">IPI00029817</a> [ <a href="#">NEU1</a> ,]                                                                                                                                                                                                                                                                                        |
| <a href="#">hsa00760</a> | 1 | 39  | 0.822044899925368  | <a href="#">IPI00020999</a> [ <a href="#">ENPP3</a> ,]                                                                                                                                                                                                                                                                                       |
| <a href="#">hsa00860</a> | 1 | 41  | 0.8371526787830414 | <a href="#">IPI00219910</a> [ <a href="#">BLVRB</a> ,]                                                                                                                                                                                                                                                                                       |
| <a href="#">hsa00790</a> | 1 | 42  | 0.8442196701557916 | <a href="#">IPI00006725</a> [ <a href="#">DDX23</a> ,]                                                                                                                                                                                                                                                                                       |
| <a href="#">hsa00620</a> | 1 | 42  | 0.8442196701557916 | <a href="#">IPI00479186</a> [ <a href="#">PKM2</a> ,]                                                                                                                                                                                                                                                                                        |
| <a href="#">hsa05219</a> | 1 | 42  | 0.8442196701557916 | <a href="#">IPI00296099</a> [ <a href="#">THBS1</a> ,]                                                                                                                                                                                                                                                                                       |
| <a href="#">hsa04930</a> | 1 | 44  | 0.8574489443840277 | <a href="#">IPI00479186</a> [ <a href="#">PKM2</a> ,]                                                                                                                                                                                                                                                                                        |
| <a href="#">hsa04070</a> | 2 | 79  | 0.8617226889382871 | <a href="#">IPI00075248</a> [ <a href="#">CALM2</a> , <a href="#">CALM1</a> , <a href="#">CALM3</a> ,]<br><a href="#">IPI00219563</a> [ <a href="#">PLCB1</a> ,]                                                                                                                                                                             |
| <a href="#">hsa04120</a> | 1 | 45  | 0.8636370916774352 | <a href="#">IPI00645078</a> [ <a href="#">UBE1</a> ,]                                                                                                                                                                                                                                                                                        |
| <a href="#">hsa00260</a> | 1 | 45  | 0.8636370916774352 | <a href="#">IPI00011200</a> [ <a href="#">PHGDH</a> ,]                                                                                                                                                                                                                                                                                       |
| <a href="#">hsa00230</a> | 4 | 144 | 0.8750776488500037 | <a href="#">IPI00031558</a> [ <a href="#">NUDT9</a> ,]<br><a href="#">IPI00026260</a> [ <a href="#">NME2</a> ,]<br><a href="#">IPI00020999</a> [ <a href="#">ENPP3</a> ,]<br><a href="#">IPI00479186</a> [ <a href="#">PKM2</a> ,]                                                                                                           |
| <a href="#">hsa04150</a> | 1 | 47  | 0.8752209414672162 | <a href="#">IPI00032561</a> [ <a href="#">CAB39</a> ,]                                                                                                                                                                                                                                                                                       |
| <a href="#">hsa04020</a> | 5 | 176 | 0.8831491705738772 | <a href="#">IPI00095891</a> [ <a href="#">GNAS</a> ,]<br><a href="#">IPI00305551</a> [ <a href="#">GNA11</a> ,]<br><a href="#">IPI00075248</a> [ <a href="#">CALM2</a> , <a href="#">CALM1</a> , <a href="#">CALM3</a> ,]<br><a href="#">IPI00219563</a> [ <a href="#">PLCB1</a> ,]<br><a href="#">IPI00288947</a> [ <a href="#">GNAQ</a> ,] |
| <a href="#">hsa05215</a> | 2 | 87  | 0.8954451664346198 | <a href="#">IPI00219757</a> [ <a href="#">GSTP1</a> ,]<br><a href="#">IPI00027230</a> [ <a href="#">TRA1</a> ,]                                                                                                                                                                                                                              |
| <a href="#">hsa00562</a> | 1 | 52  | 0.9000646301656325 | <a href="#">IPI00219563</a> [ <a href="#">PLCB1</a> ,]                                                                                                                                                                                                                                                                                       |
| <a href="#">hsa04350</a> | 2 | 89  | 0.9025923034757819 | <a href="#">IPI00027500</a> [ <a href="#">RHOA</a> ,]<br><a href="#">IPI00296099</a> [ <a href="#">THBS1</a> ,]                                                                                                                                                                                                                              |
| <a href="#">hsa00350</a> | 1 | 57  | 0.919971417914121  | <a href="#">IPI00219029</a> [ <a href="#">GOT1</a> ,]                                                                                                                                                                                                                                                                                        |
| <a href="#">hsa04662</a> | 1 | 63  | 0.9387074087304088 | <a href="#">IPI00000190</a> [ <a href="#">CD81</a> ,]                                                                                                                                                                                                                                                                                        |
| <a href="#">hsa04620</a> | 2 | 102 | 0.9390051792683572 | <a href="#">IPI00029260</a> [ <a href="#">CD14</a> ,]<br><a href="#">IPI00550917</a> [ <a href="#">PTK9L</a> ,]                                                                                                                                                                                                                              |
| <a href="#">hsa05214</a> | 1 | 64  | 0.9413734212389058 | <a href="#">IPI00075248</a> [ <a href="#">CALM2</a> , <a href="#">CALM1</a> , <a href="#">CALM3</a> ,]                                                                                                                                                                                                                                       |
| <a href="#">hsa05211</a> | 1 | 69  | 0.9530650529058009 | <a href="#">IPI00015148</a> [ <a href="#">RAP1B</a> ,]                                                                                                                                                                                                                                                                                       |
| <a href="#">hsa05218</a> | 1 | 71  | 0.9570619278260166 | <a href="#">IPI00099977</a> [ <a href="#">PDGFC</a> ,]                                                                                                                                                                                                                                                                                       |
| <a href="#">hsa05212</a> | 1 | 73  | 0.9607191879210908 | <a href="#">IPI00217519</a> [ <a href="#">RALA</a> ,]                                                                                                                                                                                                                                                                                        |
| <a href="#">hsa00240</a> | 1 | 87  | 0.9789470303949763 | <a href="#">IPI00026260</a> [ <a href="#">NME2</a> ,]                                                                                                                                                                                                                                                                                        |
| <a href="#">hsa04650</a> | 2 | 132 | 0.9801414202447388 | <a href="#">IPI00000049</a> [ <a href="#">TNFSF10</a> ,]<br><a href="#">IPI00026569</a> [ <a href="#">HLA-A</a> ,]                                                                                                                                                                                                                           |
| <a href="#">hsa04660</a> | 1 | 93  | 0.9838897339392673 | <a href="#">IPI00027500</a> [ <a href="#">RHOA</a> ,]                                                                                                                                                                                                                                                                                        |



|                          |   |     |                    |                                                                                                                                                                                                                                                                            |
|--------------------------|---|-----|--------------------|----------------------------------------------------------------------------------------------------------------------------------------------------------------------------------------------------------------------------------------------------------------------------|
| <a href="#">hsa04310</a> | 2 | 149 | 0.9896932099661784 | <a href="#">IPI00027500</a> [ <a href="#">RHOA</a> , ],<br><a href="#">IPI00219563</a> [ <a href="#">PLCB1</a> , ],                                                                                                                                                        |
| <a href="#">hsa04060</a> | 4 | 258 | 0.9964921049124374 | <a href="#">IPI00000049</a> [ <a href="#">TNFSF10</a> , ],<br><a href="#">IPI00099977</a> [ <a href="#">PDGFC</a> , ],<br><a href="#">IPI00027239</a> [ <a href="#">TNFSF12</a> , <a href="#">TNFSF13</a> , ],<br><a href="#">IPI00016593</a> [ <a href="#">CCL28</a> , ], |
| <a href="#">hsa04010</a> | 2 | 257 | 0.9998702157480374 | <a href="#">IPI00015148</a> [ <a href="#">RAP1B</a> , ],<br><a href="#">IPI00029260</a> [ <a href="#">CD14</a> , ],                                                                                                                                                        |
