# Supplementary material
Source: PubMed Central journal article supplement (PMC2693447)
Supplement: NIHMS90020-supplement-8_si_008.pdf [file NIHMS90020-supplement-8_si_008.pdf]

IPI00000001 Isoform Long of Double-stranded RNA-binding protein Staufen homolog 1  
 IPI00000105 Major vault protein  
 IPI00000137 N-acetylglucosamine-1-phosphotransferase subunit gamma precursor  
 IPI00000816 14-3-3 protein epsilon  
 IPI00000874 Peroxiredoxin-1  
 IPI00000877 150 kDa oxygen-regulated protein precursor  
 IPI00001477 Isoform 1 of Epithelial discoidin domain-containing receptor 1 precursor  
 IPI00002851 Cystatin D precursor  
 IPI00003176 Serine protease HTRA1 precursor  
 IPI00003351 Extracellular matrix protein 1 precursor  
 IPI00003362 Hypothetical protein  
 IPI00003802 Alpha-mannosidase 2  
 IPI00003865 Isoform 1 of Heat shock cognate 71 kDa protein  
 IPI00004573 Polymeric-immunoglobulin receptor precursor  
 IPI00004656 Beta-2-microglobulin precursor  
 IPI00005563 Isoform 1 of Tubulointerstitial nephritis antigen-like precursor  
 IPI00005721 Neutrophil defensin 1 precursor  
 IPI00005837 Angiopoietin-related protein 1 precursor  
 IPI00006248 glucosaminyl (N-acetyl) transferase 3, mucin type  
 IPI00006608 Isoform APP770 of Amyloid beta A4 protein precursor (Fragment)  
 IPI00006713 Isoform 1 of DnaJ homolog subfamily C member 3  
 IPI00007047 Protein S100-A8  
 IPI00007899 Single chain Fv (Fragment)  
 IPI00008274 Adenylyl cyclase-associated protein 1  
 IPI00008580 Antileukoproteinase 1 precursor  
 IPI00008994 Isoform 1 of Protein NDRG2  
 IPI00009123 Nucleobindin-2 precursor  
 IPI00009145 Mannosyl-oligosaccharide 1,2-alpha-mannosidase IB  
 IPI00009342 Ras GTPase-activating-like protein IQGAP1  
 IPI00009629 CMP-N-acetylneuraminate-beta-galactosamide-alpha-2,3-sialyltransferase  
 IPI00009866 Isoform 1 of Keratin, type I cytoskeletal 13  
 IPI00009867 Keratin, type II cytoskeletal 5  
 IPI00010214 Protein S100-A14  
 IPI00010796 Protein disulfide-isomerase precursor  
 IPI00011285 Calpain-1 catalytic subunit  
 IPI00011302 CD59 glycoprotein precursor  
 IPI00011654 Tubulin beta chain  
 IPI00011692 Involucrin  
 IPI00011937 Peroxiredoxin-4  
 IPI00012011 Cofilin-1  
 IPI00012426 Isoform 1 of Retinoid-inducible serine carboxypeptidase precursor  
 IPI00012540 Prominin-1 precursor  
 IPI00013508 Alpha-actinin-1  
 IPI00013808 Alpha-actinin-4  
 IPI00013895 Protein S100-A11  
 IPI00013933 Isoform DPI of Desmoplakin  
 IPI00014537 Isoform 1 of Calumenin precursor  
 IPI00015309 Keratin, type I cytoskeletal 12  
 IPI00016593 Small inducible cytokine A28 precursor  
 IPI00017292 Isoform 1 of Catenin beta-1  
 IPI00017608 DnaJ homolog subfamily B member 9  
 IPI00018146 14-3-3 protein theta  
 IPI00018219 Transforming growth factor-beta-induced protein ig-h3 precursor  
 IPI00018387 Furin precursor  
 IPI00018953 Dipeptidyl peptidase 4  
 IPI00019038 Lysozyme C precursor  
 IPI00019359 Keratin, type I cytoskeletal 9  
 IPI00019502 Myosin-9  
 IPI00019580 Plasminogen precursor  
 IPI00019591 Isoform 1 of Complement factor B precursor (Fragment)  
 IPI00020430 53 kDa protein  
 IPI00020599 Calreticulin precursor  
 IPI00020987 Prolargin precursor  
 IPI00021263 14-3-3 protein zeta/delta

IPI00021304 Keratin, type II cytoskeletal 2 epidermal  
 IPI00021384 Isoform 1 of Alpha-(1,3)-fucosyltransferase  
 IPI00021439 Actin, cytoplasmic 1  
 IPI00021812 Neuroblast differentiation-associated protein AHNAK (Fragment)  
 IPI00021828 Cystatin B  
 IPI00021841 Apolipoprotein A-I precursor  
 IPI00021854 Apolipoprotein A-II precursor  
 IPI00022255 olfactomedin 4 precursor  
 IPI00022810 Dipeptidyl-peptidase 1 precursor  
 IPI00022822 Isoform Long of Collagen alpha-1(XVIII) chain precursor  
 IPI00022974 Prolactin-inducible protein precursor  
 IPI00023673 Galectin-3-binding protein precursor  
 IPI00023711 Envoplakin  
 IPI00024067 clathrin heavy chain 1  
 IPI00024570 Semaphorin-3G precursor  
 IPI00024915 Isoform Mitochondrial of Peroxiredoxin-5, mitochondrial precursor  
 IPI00024989 Protein-L-isoaspartate (D-aspartate) O-methyltransferase  
 IPI00025252 Protein disulfide-isomerase A3 precursor  
 IPI00025512 Heat-shock protein beta-1  
 IPI00025846 Isoform 2A of Desmocollin-2 precursor  
 IPI00026185 Isoform 1 of F-actin capping protein subunit beta  
 IPI00026197 Similar to Ig kappa chain V-IV region STH  
 IPI00026260 Nucleoside diphosphate kinase B  
 IPI00026314 Isoform 1 of Gelsolin precursor  
 IPI00026941 Serine protease 23 precursor  
 IPI00027192 Procollagen-lysine,2-oxoglutarate 5-dioxygenase 1 precursor  
 IPI00027230 Endoplasmin precursor  
 IPI00027239 Isoform Alpha of Tumor necrosis factor ligand superfamily member  
 13 precursor  
 IPI00027350 Peroxiredoxin-2  
 IPI00027462 Protein S100-A9  
 IPI00027463 Protein S100-A6  
 IPI00027493 4F2 cell-surface antigen heavy chain  
 IPI00027497 Glucose-6-phosphate isomerase  
 IPI00027500 Transforming protein RhoA precursor  
 IPI00027806 Cysteine-rich secretory protein LCCL domain-containing 1 precursor  
 IPI00028714 Matrix Gla-protein precursor  
 IPI00028911 Dystroglycan precursor  
 IPI00029061 Selenoprotein P precursor  
 IPI00029260 Monocyte differentiation antigen CD14 precursor  
 IPI00029275 Isoform 1 of Melanotransferrin precursor  
 IPI00029817 Sialidase-1 precursor  
 IPI00030205 Ig kappa chain V-III region HAH precursor  
 IPI00030828 90 kDa protein  
 IPI00031461 Rab GDP dissociation inhibitor beta  
 IPI00032293 Cystatin C precursor  
 IPI00032294 Cystatin S precursor  
 IPI00060800 hypothetical protein LOC124220  
 IPI00061977 IGHA1 protein  
 IPI00062120 Protein S100-A16  
 IPI00065533 Protein FAM20A precursor  
 IPI00066193 Uteroglobin-related protein 2 precursor  
 IPI00067738 Isoform B of Protein FAM3B precursor  
 IPI00082931 Small proline-rich protein 3  
 IPI00099977 platelet-derived growth factor C precursor  
 IPI00106646 45 kDa calcium-binding protein precursor  
 IPI00152154 Mucin-7 precursor  
 IPI00154742 25 kDa protein  
 IPI00164623 187 kDa protein  
 IPI00165949 type 1 tumor necrosis factor receptor shedding aminopeptidase  
 regulator isoform a  
 IPI00166205 Keratin 5b  
 IPI00166729 alpha-2-glycoprotein 1, zinc  
 IPI00166866 IGHA1 protein  
 IPI00168884 Renin receptor precursor  
 IPI00169383 Phosphoglycerate kinase 1  
 IPI00174775 Keratin 6 irs3

IPI00177543 Isoform 1 of Peptidyl-glycine alpha-amidating monooxygenase precursor  
 IPI00178926 immunoglobulin J chain  
 IPI00180675 Tubulin alpha-3 chain  
 IPI00182469 Isoform 1AB of Catenin delta-1  
 IPI00184851 Type 2 lactosamine alpha-2,3-sialyltransferase  
 IPI00186145 Isoform 1 of Protein phosphatase 2C isoform epsilon  
 IPI00186290 Elongation factor 2  
 IPI00215767 Isoform Long of Beta-1,4-galactosyltransferase 1  
 IPI00215997 CD9 antigen  
 IPI00216318 tyrosine 3-monooxygenase/tryptophan 5-monooxygenase activation protein, beta polypeptide  
 IPI00216319 14-3-3 protein eta  
 IPI00216457 Histone H2A type 2-A  
 IPI00217963 Keratin, type I cytoskeletal 16  
 IPI00218918 Annexin A1  
 IPI00219018 Glyceraldehyde-3-phosphate dehydrogenase  
 IPI00219029 Aspartate aminotransferase, cytoplasmic  
 IPI00219221 Galectin-7  
 IPI00219365 Moesin  
 IPI00219446 Phosphatidylethanolamine-binding protein 1  
 IPI00219757 Glutathione S-transferase P  
 IPI00220120 Ig heavy chain V-III region VH26 precursor  
 IPI00220327 Keratin, type II cytoskeletal 1  
 IPI00220642 14-3-3 protein gamma  
 IPI00241841 keratin 6L  
 IPI00246058 PDCD6IP protein  
 IPI00247167 CDNA FLJ41947 fis, clone PLACE6019932, moderately similar to Ictalurus punctatus NCC receptor protein 1 (NCCRP-1) mRNA  
 IPI00290077 Keratin, type I cytoskeletal 15  
 IPI00290078 keratin 4  
 IPI00291136 Collagen alpha-1(VI) chain precursor  
 IPI00291262 Clusterin precursor  
 IPI00291410 Isoform 1 of Long palate, lung and nasal epithelium carcinoma-associated protein 1 precursor  
 IPI00291641 Mannosyl-oligosaccharide 1,2-alpha-mannosidase IA  
 IPI00292732 fibromodulin precursor  
 IPI00293665 Keratin, type II cytoskeletal 6B  
 IPI00295105 Carbonic anhydrase 6 precursor  
 IPI00295386 Carbonyl reductase [NADPH] 1  
 IPI00295542 Nucleobindin-1 precursor  
 IPI00295741 Cathepsin B precursor  
 IPI00296099 Thrombospondin-1 precursor  
 IPI00296922 Laminin beta-2 chain precursor  
 IPI00297056 Cornulin  
 IPI00298057 Periplakin  
 IPI00298860 Growth-inhibiting protein 12  
 IPI00298971 Vitronectin precursor  
 IPI00299086 Syntenin-1  
 IPI00300376 Protein-glutamine gamma-glutamyltransferase E precursor  
 IPI00300725 Keratin, type II cytoskeletal 6A  
 IPI00300786 Salivary alpha-amylase precursor  
 IPI00302641 Protocadherin Fat 2 precursor  
 IPI00303476 ATP synthase subunit beta, mitochondrial precursor  
 IPI00304557 Short palate, lung and nasal epithelium carcinoma-associated protein 2 precursor  
 IPI00304840 Isoform 2C2 of Collagen alpha-2(VI) chain precursor  
 IPI00304925 Heat shock 70 kDa protein 1  
 IPI00305622 Protein-glutamine gamma-glutamyltransferase K  
 IPI00329482 Isoform 1 of Laminin alpha-4 chain precursor  
 IPI00329538 Prostatin precursor  
 IPI00329801 Annexin A5  
 IPI00336173 FX1D domain-containing ion transport regulator 3 precursor  
 IPI00339269 Heat shock 70 kDa protein 6  
 IPI00374551 Cytokeratin associated protein  
 IPI00375746 CDNA FLJ16386 fis, clone TRACH2000862, moderately similar to Mus musculus putative purine nucleotide binding protein mRNA

IPI00382470 Heat shock protein HSP 90-alpha 2  
IPI00382478 Ig heavy chain V-III region TIL  
IPI00383111 57 kDa protein  
IPI00383581 Isoform 1 of Neutral alpha-glucosidase AB precursor  
IPI00384444 Keratin, type I cytoskeletal 14  
IPI00385143 Microfibrillar protein 2 (Fragment)  
IPI00385252 Ig kappa chain V-III region GOL  
IPI00385264 Ig mu heavy chain disease protein  
IPI00386879 CDNA FLJ14473 fis, clone MAMMA1001080, highly similar to Homo sapiens SNC73 protein (SNC73) mRNA  
IPI00387110 Ig kappa chain V-II region MIL  
IPI00387115 Ig kappa chain V-III region SIE  
IPI00394834 Colon cancer secreted protein-2  
IPI00396383 von Willebrand factor A domain-related protein isoform 1  
IPI00401264 Thioredoxin domain-containing protein 4 precursor  
IPI00410155 AVLV472  
IPI00410240 Isoform 2 of Retinoic acid receptor responder protein 1  
IPI00414315 Isoform 1 of Epidermal growth factor receptor kinase substrate 8-like protein 2  
IPI00414884 Hypothetical protein DKFZp686N12252  
IPI00419215 CDNA FLJ41598 fis, clone CTONG2025496, weakly similar to ALPHA-2-MACROGLOBULIN  
IPI00419585 Peptidyl-prolyl cis-trans isomerase A  
IPI00423460 Hypothetical protein DKFZp686G21220 (Fragment)  
IPI00423461 Hypothetical protein DKFZp686C02220 (Fragment)  
IPI00423462 Hypothetical protein DKFZp686K18196 (Fragment)  
IPI00426060 Hypothetical protein DKFZp686J11235 (Fragment)  
IPI00430808 Hypothetical protein  
IPI00430820 IGKV1-5 protein  
IPI00430842 IGHA1 protein  
IPI00441498 Folate receptor alpha precursor  
IPI00450768 Keratin, type I cytoskeletal 17  
IPI00453473 Histone H4  
IPI00465028 Triosephosphate isomerase 1 variant  
IPI00465248 enolase 1  
IPI00465431 Galectin-3  
IPI00465439 Fructose-bisphosphate aldolase A  
IPI00472961 IGKC protein  
IPI00477644 26 kDa protein  
IPI00479018 Syntenin isoform 3  
IPI00479186 pyruvate kinase 3 isoform 1  
IPI00479708 IGHM protein  
IPI00514908 Novel protein  
IPI00549291 IGHM protein  
IPI00550731 Hypothetical protein
