# Supplementary material
Source: PubMed Central journal article supplement (PMC2693447)
Supplement: NIHMS90020-supplement-9_si_009.pdf [file NIHMS90020-supplement-9_si_009.pdf]

IPI00000816 14-3-3 protein epsilon  
IPI00003362 Hypothetical protein  
IPI00003865 Isoform 1 of Heat shock cognate 71 kDa protein  
IPI00004573 Polymeric-immunoglobulin receptor precursor  
IPI00005721 Neutrophil defensin 1 precursor  
IPI00010796 Protein disulfide-isomerase precursor  
IPI00011302 CD59 glycoprotein precursor  
IPI00012011 Cofilin-1  
IPI00012540 Prominin-1 precursor  
IPI00013508 Alpha-actinin-1  
IPI00013895 Protein S100-A11  
IPI00018146 14-3-3 protein theta  
IPI00018953 Dipeptidyl peptidase 4  
IPI00019502 Myosin-9  
IPI00020599 Calreticulin precursor  
IPI00021263 14-3-3 protein zeta/delta  
IPI00022255 olfactomedin 4 precursor  
IPI00023673 Galectin-3-binding protein precursor  
IPI00027350 Peroxiredoxin-2  
IPI00027463 Protein S100-A6  
IPI00027497 Glucose-6-phosphate isomerase  
IPI00027500 Transforming protein RhoA precursor  
IPI00062120 Protein S100-A16  
IPI00169383 Phosphoglycerate kinase 1  
IPI00215997 CD9 antigen  
IPI00216318 tyrosine 3-monooxygenase/tryptophan 5-monooxygenase activation  
protein, beta polypeptide  
IPI00219018 Glyceraldehyde-3-phosphate dehydrogenase  
IPI00219365 Moesin  
IPI00219446 Phosphatidylethanolamine-binding protein 1  
IPI00219757 Glutathione S-transferase P  
IPI00220642 14-3-3 protein gamma  
IPI00246058 PDCD6IP protein  
IPI00291136 Collagen alpha-1(VI) chain precursor  
IPI00296099 Thrombospondin-1 precursor  
IPI00298971 Vitronectin precursor  
IPI00299086 Syntenin-1  
IPI00304925 Heat shock 70 kDa protein 1  
IPI00329801 Annexin A5  
IPI00339269 Heat shock 70 kDa protein 6  
IPI00382470 Heat shock protein HSP 90-alpha 2  
IPI00419585 Peptidyl-prolyl cis-trans isomerase A  
IPI00453473 Histone H4  
IPI00465028 Triosephosphate isomerase 1 variant  
IPI00465248 enolase 1  
IPI00465439 Fructose-bisphosphate aldolase A  
IPI00479186 pyruvate kinase 3 isoform 1
