# Supplementary material
Source: PubMed Central journal article supplement (PMC2693447)

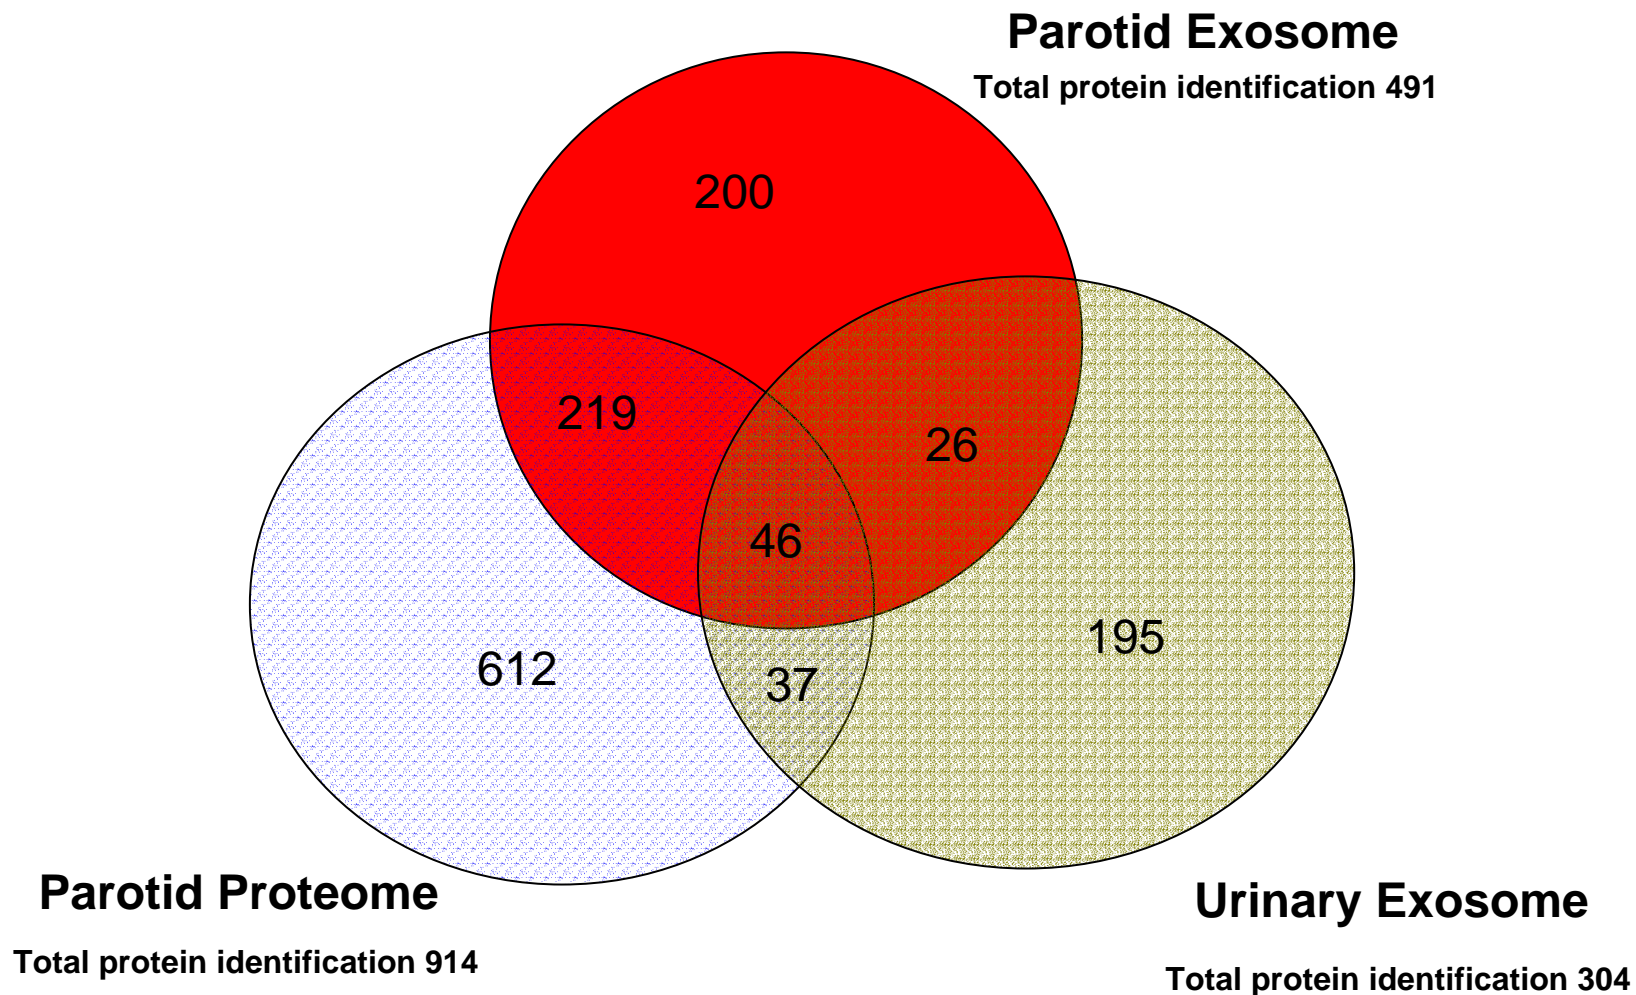

**Supplemental Figure # 1**

Supplement: NIHMS90020-supplement-10_si_010.pdf [file NIHMS90020-supplement-10_si_010.pdf]
